# Supplementary material for: SIRT1 increases YAP- and MKK3-dependent p38 phosphorylation in mouse liver and human hepatocellular carcinoma
Source: PubMed Central journal article supplement (PMC4905473; doi:10.18632/oncotarget.7022), 2016-01-25
Supplement: oncotarget-07-11284-s001.pdf [file oncotarget-07-11284-s001.pdf]

## SUPPLEMENTARY FIGURE AND TABLE

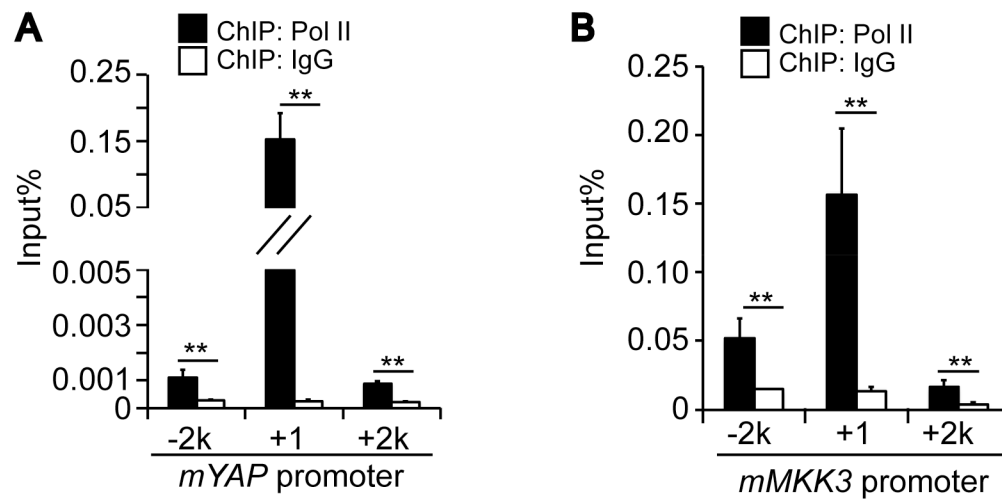

**Supplementary Figure S1: Binding of Polymerase II (Pol II) at the mouse *YAP* (*mYAP*) and mouse *MKK3* (*mMKK3*) promoters.** The bindings of Pol II at the +1 regions of *mYAP* **A.** and *mMKK3* promoters **B.** were measured by ChIP experiments. A 2k region upstream (-2k) of the transcription start site (TSS) or a 2k region downstream (+2k) of *mYAP* or *mMKK3* genes were also parallel analyzed as the negative controls. ChIP experiments using a non-specific IgG control were also performed to support the specific bindings of Pol II. The data are shown as the means + SD from three independent experiments. \*\*,  $p < 0.01$  using the Student's t test.

**Supplementary Table S1: Primers used in the study****Table S1-1 Primers for qPCR (both for regular-qPCR, CHART-PCR and ChIP-qPCR)**

| Name              | 5'-3'                           |
|-------------------|---------------------------------|
| ChIP-mYAP -2K-F   | CACTATCACACAGTCCTGTGTG          |
| ChIP-mYAP -2K-R   | GCTAGCTTCAGACAGGTAAGATTTG       |
| ChIP-mYAP -+1-F   | GCGCAGAGGAAGGAAGAGCGTCGAG       |
| ChIP-mYAP -+1-R   | CCCCTCTCCTCCCCCTCCCCTCCGCGAGCTC |
| ChIP-mYAP -+2K-F  | GTTTATTTGTAACCTTATGTATCTG       |
| ChIP-mYAP -+2K-R  | GGGCAGCACCCGGGTGCTCCACAC        |
| ChIP-mMKK3 -2K-F  | GGGAGGCTTTTCCTGACTGCCCTC        |
| ChIP-mMKK3 -2K-R  | CTGTGGATGTAGCATTGTGGGATC        |
| ChIP-mMKK3 -+1-F  | GCCTTTTCAGGCGGGCCAATCAG         |
| ChIP-mMKK3 -+1-R  | CTAATCTAGAGGACAGCAGACTACACCG    |
| ChIP-mMKK3 -+2K-F | GTAACAGTCAGCGCTGACCATTGGCTC     |
| ChIP-mMKK3 -+2K-R | GCAACAGGAGACAGACACTGCTACCTC     |
| ChIP-hMKK3 -2K-F  | CTGAGTCAGTAACAAAGACATCAG        |
| ChIP-hMKK3 -2K-R  | TGTGCCAGGGATGGTCCTGCCGACG       |
| ChIP-hMKK3 -+1-F  | AGGCAGGGACAGGCCGGCGTCTG         |
| ChIP-hMKK3 -+1-R  | GCGACGGGCGGGCGCCGGAGACAGAC      |
| ChIP-hMKK3 -+2K-F | CTGGCTGGATGCCGACCCCTTCAC        |
| ChIP-hMKK3 -+2K-R | CTGTGCTTTGTAAATGTTAGTGACCTGC    |
| mFOS-qPCR-F       | CAGAAGGGGCAAAGTAGAGC            |
| mFOS-qPCR-R       | GCAACGCAGACTTCTCATCTTC          |
| mFLNA-qPCR-F      | ACTTCCCCAGCAAGCTACAG            |
| mFLNA-qPCR-R      | TGGCCCTCCAGTCTGTGTAA            |
| mMKK3-qPCR-F      | CACCTTCTATGGTGCCCTCTT           |
| mMKK3-qPCR-R      | CACAGACAGCTTGCTATGCAG           |
| hMKK3-qPCR-F      | GCATGGAGCTCATGGACACA            |
| hMKK3-qPCR-R      | AGGACATTGGAGGGCTTCAC            |
| mGAPDH-qPCR-F     | ATCATCCCTGCCTCTACTGG            |
| mGAPDH-qPCR-R     | GTCAGGTCCACCACTGACAC            |
| hGAPDH-QPCR-F     | ATCATCCCTGCCTCTACTGG            |
| hGAPDH-QPCR-R     | GTCAGGTCCACCACTGACAC            |

**Supplementary Table S1-2: Primers used for construction of *hMKK3* promoter reporter**

| Name    | 5'-3'                               |
|---------|-------------------------------------|
| hMKK3-F | ATGCGGTACCCAAGAAGCAGAGTGCACAAGGCGGA |
| hMKK3-R | ATGCGATATCGCGGTGGAGACTAATCTAGAGGACT |
